# Supplementary material for: Primary renal lymphoma: a population-based study in the United States, 1980–2013
Source: PubMed Central journal article supplement (PMC6805900; doi:10.1038/s41598-019-51635-6), 2019-10-22
Supplement: 41598_2019_51635_MOESM1_ESM.pdf [file 41598_2019_51635_MOESM1_ESM.pdf]

**Primary renal lymphoma: a population-based study in the United States,  
1980-2013**

Jiayuan Chen, Jiangtong Peng, Yongqiang Zheng, Sen Li, Pengcheng Yang,  
Xiangyi Wu, He Tian, Hui Liu, Shengli Yang, Wenjing Wang, Bian Wu

## **Supplementary materials**

### **Supplementary materials legends**

**Supplementary Figure 1.** Kaplan–Meier estimate of relative survival (RS) and disease-specific survival (DSS) of patients with primary renal lymphoma (PRL) by different clinical factors.

**Supplementary Figure 2.** Kaplan–Meier estimate of relative survival (RS) and disease-specific survival (DSS) of patients with primary renal diffuse large B-cell lymphoma (DLBCL) vs. primary nodal DLBCL.

**Supplementary Table 1.** Vital status and Causes of death in patients with primary renal lymphoma (PRL)

**Supplementary Table 2.** Laterality of primary renal lymphoma (PRL) in patients younger than 18 vs. patients aging at 18 or older

**Supplementary Table 3.** Demographic characteristics and incidence rates of patients with primary renal lymphoma (PRL) by different sex in SEER-9 database

**Supplementary Table 4.** Annual incidence rate of primary renal lymphoma (PRL) in SEER-9 database

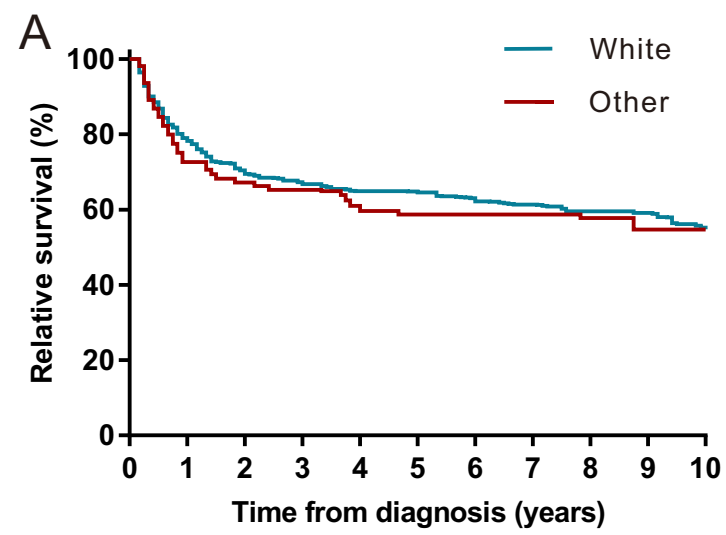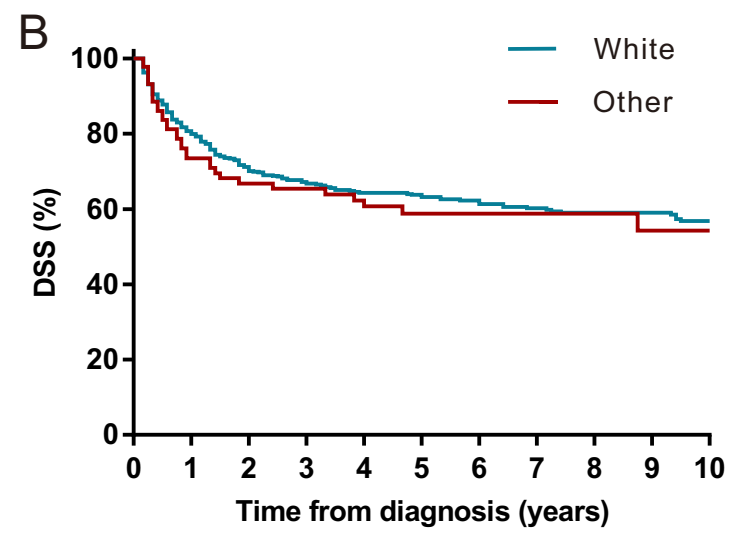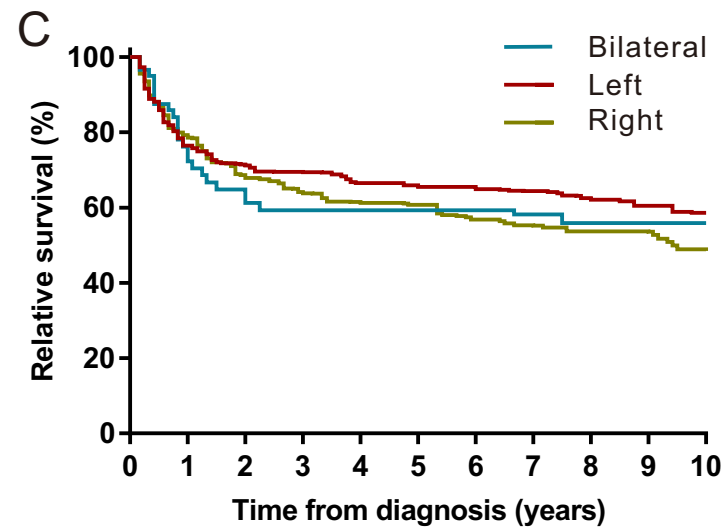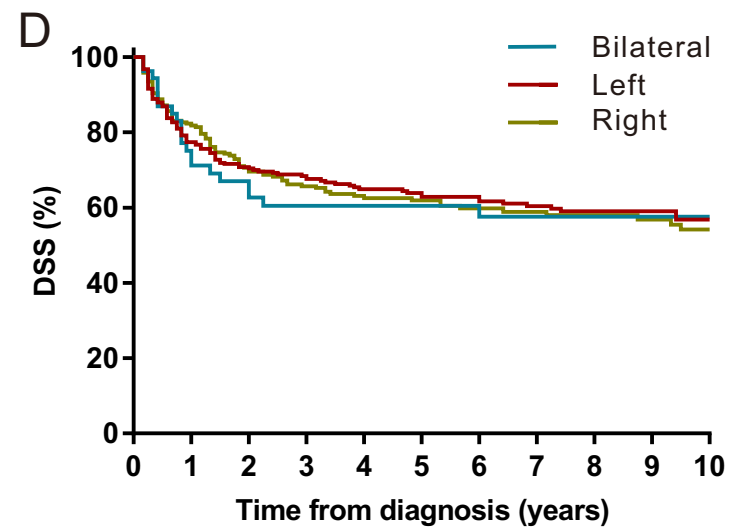

**Supplementary Figure 1.** Kaplan–Meier estimate of relative survival (RS) and disease-specific survival (DSS) of patients with PRL by different clinical factors. (A) RS by race; (B) DSS by race; (C) RS by laterality; (D) DSS by laterality.

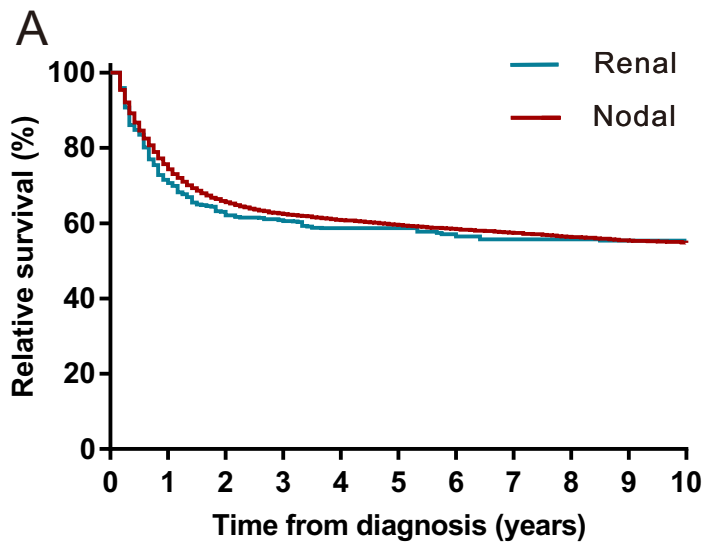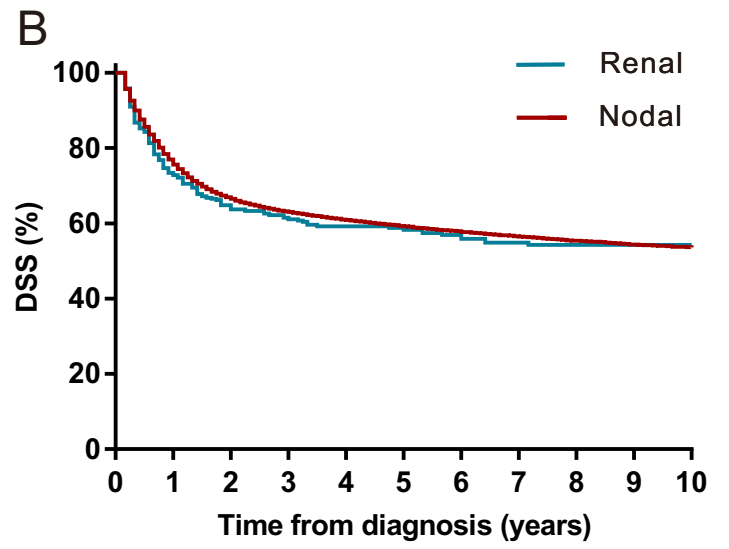

**Supplementary Figure 2.** Kaplan–Meier estimate of relative survival (RS) and disease-specific survival (DSS) of patients with primary renal diffuse large B-cell lymphoma (DLBCL) vs. primary nodal DLBCL. (A) RS; (B) DSS.

**Supplementary Table 1.** Vital status and Causes of death in patients with PRL.

| Cause of death                             | No. (%)     |
|--------------------------------------------|-------------|
| All death                                  | 423 (100%)  |
| PRL                                        | 253 (59.8%) |
| Cardiovascular diseases                    | 46 (10.9%)  |
| Other malignant cancers                    | 45 (10.6%)  |
| Infectious diseases                        | 32 (7.6%)   |
| Renal diseases                             | 7 (1.7%)    |
| Alzheimer's disease (ICD-9 and 10 only)    | 4 (0.9%)    |
| Diabetes mellitus                          | 4 (0.9%)    |
| Accidents and adverse effects              | 4 (0.9%)    |
| Chronic obstructive pulmonary disease      | 3 (0.7%)    |
| Chronic liver disease and cirrhosis        | 1 (0.2%)    |
| Symptoms, signs and ill-defined conditions | 2 (0.5%)    |
| Other cause of death                       | 19 (4.5%)   |
| Unknown                                    | 3 (0.7%)    |

**Supplementary Table 2.** Laterality of PRL in patients younger than 18 vs. patients aging at 18 or older

| Characteristics | No. of patients |             | <i>p</i> <sup>a</sup> |
|-----------------|-----------------|-------------|-----------------------|
|                 | <18             | ≥18         | %                     |
| Laterality      |                 |             | < 0.001               |
| Bilateral       | 9 (39.1%)       | 48 (6.9%)   |                       |
| Single          | 12 (52.2%)      | 620 (88.6%) |                       |
| Unknown or N/A  | 2 (8.7%)        | 32 (4.6%)   |                       |

N/A, not applicable.

<sup>a</sup>The chi-square test was used.

**Supplementary Table 3.** Demographic characteristics and incidence rates of patients with PRL by different sex in SEER-9 database

| Characteristics | Demographic characteristics |                   |         | Incidence rates   |                |             |
|-----------------|-----------------------------|-------------------|---------|-------------------|----------------|-------------|
|                 | No. of patients             | No. of Population | $p^a$   | Age-Adjusted Rate | Standard Error | 95% CI      |
| All patients    | 436 (100%)                  | 8.70E+08 (100%)   |         | 0.0528            | 0.0025         | 0.048-0.058 |
| Sex             |                             |                   | < 0.001 |                   |                |             |
| Male            | 273 (62.6%)                 | 4.27E+08 (49.1%)  |         | 0.0776            | 0.0048         | 0.069-0.088 |
| Female          | 163 (37.4%)                 | 4.43E+08 (50.9%)  |         | 0.0352            | 0.0028         | 0.030-0.041 |

<sup>a</sup>The chi-square test was used.

**Supplementary Table 4. Annual incidence rate of PRL in SEER-9 database**

| Year | Overall incidence           |        |               | Male incidence              |        |               | Female incidence            |        |               |
|------|-----------------------------|--------|---------------|-----------------------------|--------|---------------|-----------------------------|--------|---------------|
|      | Incidence rate <sup>a</sup> | SE     | 95% CI        | Incidence rate <sup>a</sup> | SE     | 95% CI        | Incidence rate <sup>a</sup> | SE     | 95% CI        |
| 1980 | 0.0201                      | 0.0101 | 0.0054-0.052  | 0.0316                      | 0.0183 | 0.0065-0.0958 | 0.0096                      | 0.0096 | 0.0002-0.0535 |
| 1981 | 0.0127                      | 0.0073 | 0.0026-0.0391 | 0.0267                      | 0.0154 | 0.0055-0.0851 | 0.0001 <sup>b</sup>         | 0.0001 | 0-0.0353      |
| 1982 | 0.0148                      | 0.0086 | 0.003-0.0435  | 0.0219                      | 0.0156 | 0.0026-0.0812 | 0.0091                      | 0.0091 | 0.0002-0.0516 |
| 1983 | 0.0152                      | 0.0088 | 0.0031-0.0444 | 0.0191                      | 0.0135 | 0.0023-0.074  | 0.0099                      | 0.0099 | 0.0002-0.0534 |
| 1984 | 0.0275                      | 0.0113 | 0.01-0.0607   | 0.0181                      | 0.0128 | 0.0022-0.0711 | 0.0337                      | 0.0169 | 0.0091-0.088  |
| 1985 | 0.0295                      | 0.0123 | 0.0105-0.0646 | 0.0228                      | 0.0161 | 0.0028-0.0818 | 0.0368                      | 0.019  | 0.0095-0.0953 |
| 1986 | 0.0304                      | 0.0117 | 0.0119-0.0639 | 0.0533                      | 0.0271 | 0.0141-0.1328 | 0.0158                      | 0.0112 | 0.0019-0.0596 |
| 1987 | 0.0366                      | 0.0131 | 0.0156-0.0728 | 0.0382                      | 0.0194 | 0.0102-0.101  | 0.0331                      | 0.0166 | 0.009-0.0859  |
| 1988 | 0.0268                      | 0.012  | 0.0087-0.0613 | 0.0328                      | 0.0241 | 0.0035-0.1081 | 0.0255                      | 0.0148 | 0.0053-0.075  |
| 1989 | 0.0398                      | 0.0135 | 0.0179-0.0763 | 0.0323                      | 0.0165 | 0.0085-0.0884 | 0.0400                      | 0.018  | 0.0128-0.0946 |
| 1990 | 0.0433                      | 0.0146 | 0.0195-0.0819 | 0.0964                      | 0.0327 | 0.0434-0.1833 | 0.0001 <sup>b</sup>         | 0.0001 | 0-0.031       |
| 1991 | 0.0501                      | 0.0152 | 0.0248-0.0896 | 0.0850                      | 0.0335 | 0.0325-0.1746 | 0.0304                      | 0.0152 | 0.0083-0.0793 |
| 1992 | 0.0351                      | 0.0125 | 0.015-0.0692  | 0.037                       | 0.0188 | 0.0098-0.0963 | 0.0338                      | 0.017  | 0.0091-0.0861 |
| 1993 | 0.0431                      | 0.0137 | 0.0206-0.0792 | 0.0764                      | 0.0273 | 0.0326-0.151  | 0.0153                      | 0.0108 | 0.0019-0.0561 |
| 1994 | 0.0593                      | 0.016  | 0.0323-0.0996 | 0.0938                      | 0.0302 | 0.0443-0.1734 | 0.0285                      | 0.0143 | 0.0078-0.0745 |
| 1995 | 0.0505                      | 0.0146 | 0.026-0.088   | 0.0537                      | 0.022  | 0.0197-0.1171 | 0.0495                      | 0.0203 | 0.0181-0.107  |
| 1996 | 0.0164                      | 0.0082 | 0.0045-0.0419 | 0.0242                      | 0.0178 | 0.0026-0.082  | 0.0145                      | 0.0102 | 0.0018-0.0533 |
| 1997 | 0.0499                      | 0.0144 | 0.0257-0.0868 | 0.0821                      | 0.0276 | 0.0373-0.1556 | 0.0215                      | 0.0125 | 0.0044-0.0638 |
| 1998 | 0.0688                      | 0.0167 | 0.0401-0.1099 | 0.1120                      | 0.0329 | 0.0572-0.1956 | 0.0353                      | 0.0158 | 0.0114-0.0831 |
| 1999 | 0.0795                      | 0.0178 | 0.0485-0.1227 | 0.1011                      | 0.0294 | 0.0519-0.177  | 0.0561                      | 0.0200 | 0.024-0.1115  |
| 2000 | 0.0500                      | 0.0139 | 0.0266-0.0854 | 0.0745                      | 0.0251 | 0.0337-0.142  | 0.0305                      | 0.0152 | 0.0083-0.0774 |
| 2001 | 0.0699                      | 0.0165 | 0.0414-0.1104 | 0.0974                      | 0.0299 | 0.0479-0.1743 | 0.0513                      | 0.0194 | 0.0206-0.1055 |
| 2002 | 0.0616                      | 0.0155 | 0.0351-0.1    | 0.0741                      | 0.0249 | 0.0336-0.1409 | 0.0507                      | 0.0192 | 0.0203-0.1044 |
| 2003 | 0.0766                      | 0.0172 | 0.0467-0.1184 | 0.1101                      | 0.0319 | 0.0567-0.1908 | 0.0547                      | 0.0194 | 0.0236-0.1084 |
| 2004 | 0.0558                      | 0.0145 | 0.0311-0.0921 | 0.0800                      | 0.0271 | 0.0361-0.1512 | 0.041                       | 0.0167 | 0.015-0.0897  |
| 2005 | 0.0605                      | 0.0152 | 0.0344-0.0982 | 0.0971                      | 0.0295 | 0.0482-0.1725 | 0.0329                      | 0.0148 | 0.0106-0.078  |
| 2006 | 0.0772                      | 0.0166 | 0.0481-0.1173 | 0.1118                      | 0.0316 | 0.0587-0.1911 | 0.0571                      | 0.0191 | 0.026-0.1097  |

**Continued**



| Year        | Overall incidence           |        |               | Male incidence              |        |               | Female incidence            |        |               |
|-------------|-----------------------------|--------|---------------|-----------------------------|--------|---------------|-----------------------------|--------|---------------|
|             | Incidence rate <sup>a</sup> | SE     | 95% CI        | Incidence rate <sup>a</sup> | SE     | 95% CI        | Incidence rate <sup>a</sup> | SE     | 95% CI        |
| <b>2007</b> | 0.0631                      | 0.0151 | 0.0371-0.1004 | 0.0926                      | 0.0274 | 0.047-0.163   | 0.0379                      | 0.0158 | 0.0135-0.0845 |
| <b>2008</b> | 0.0802                      | 0.0173 | 0.0499-0.1218 | 0.0730                      | 0.0249 | 0.0327-0.139  | 0.0876                      | 0.0245 | 0.0464-0.1504 |
| <b>2009</b> | 0.0803                      | 0.0166 | 0.0511-0.1202 | 0.1489                      | 0.0349 | 0.0886-0.2335 | 0.0253                      | 0.0114 | 0.0081-0.0629 |
| <b>2010</b> | 0.0896                      | 0.0178 | 0.0583-0.1318 | 0.1598                      | 0.0378 | 0.0945-0.2508 | 0.0447                      | 0.0159 | 0.0192-0.0905 |
| <b>2011</b> | 0.0586                      | 0.0141 | 0.0344-0.0935 | 0.0865                      | 0.0265 | 0.0426-0.1547 | 0.0399                      | 0.0153 | 0.0157-0.0846 |
| <b>2012</b> | 0.0473                      | 0.0124 | 0.0262-0.0788 | 0.0572                      | 0.0204 | 0.0244-0.1132 | 0.0438                      | 0.0169 | 0.0172-0.0918 |
| <b>2013</b> | 0.0656                      | 0.0142 | 0.0408-0.1003 | 0.1008                      | 0.0275 | 0.0543-0.1702 | 0.0398                      | 0.0142 | 0.0170-0.0818 |

SE, standard error; NR, not reached.

<sup>a</sup>Incidence rates were age-adjusted to the 2000 US standard population and expressed per 100,000 person-years.

<sup>b</sup>The values equal to zero when there were no cases reported were modified to a small positive constant (e. g. 0.0001), according to the statistical transformation.

**Supplementary Table 5. Annual mortality rate of PRL in SEER-9 database**

| Year | Overall mortality rate      |        |               | Male mortality rate         |        |               | Female mortality rate       |        |               |
|------|-----------------------------|--------|---------------|-----------------------------|--------|---------------|-----------------------------|--------|---------------|
|      | Incidence rate <sup>a</sup> | SE     | 95% CI        | Incidence rate <sup>a</sup> | SE     | 95% CI        | Incidence rate <sup>a</sup> | SE     | 95% CI        |
| 1980 | 0.0257                      | 0.0115 | 0.0083-0.0601 | 0.0216                      | 0.0153 | 0.0026-0.0813 | 0.0273                      | 0.0158 | 0.0056-0.081  |
| 1981 | 0.0085                      | 0.006  | 0.001-0.033   | 0.0185                      | 0.0131 | 0.0022-0.0736 | 0.0001 <sup>b</sup>         | 0.0001 | 0-0.0353      |
| 1982 | 0.0001 <sup>b</sup>         | 0.0001 | 0-0.0188      | 0.0001 <sup>b</sup>         | 0.0001 | 0-0.0438      | 0.0001 <sup>b</sup>         | 0.0001 | 0-0.0348      |
| 1983 | 0.0157                      | 0.0091 | 0.0032-0.0454 | 0.0215                      | 0.0153 | 0.0026-0.0798 | 0.0099                      | 0.0099 | 0.0002-0.0534 |
| 1984 | 0.0147                      | 0.0086 | 0.0029-0.0433 | 0.0353                      | 0.0218 | 0.0062-0.1055 | 0.0001 <sup>b</sup>         | 0.0001 | 0-0.0339      |
| 1985 | 0.0104                      | 0.0074 | 0.0012-0.0368 | 0.0001 <sup>b</sup>         | 0.0001 | 0-0.0416      | 0.0184                      | 0.013  | 0.0022-0.0661 |
| 1986 | 0.0148                      | 0.0088 | 0.0028-0.0436 | 0.0280                      | 0.0228 | 0.002-0.102   | 0.0092                      | 0.0092 | 0.0002-0.0504 |
| 1987 | 0.0183                      | 0.0094 | 0.0048-0.0475 | 0.0203                      | 0.0147 | 0.0023-0.0756 | 0.0150                      | 0.0106 | 0.0018-0.0575 |
| 1988 | 0.0328                      | 0.0125 | 0.013-0.0677  | 0.0706                      | 0.0307 | 0.0239-0.1558 | 0.0087                      | 0.0087 | 0.0002-0.0485 |
| 1989 | 0.0144                      | 0.0084 | 0.0029-0.0417 | 0.0001 <sup>b</sup>         | 0.0001 | 0-0.0386      | 0.0238                      | 0.0138 | 0.0049-0.0711 |
| 1990 | 0.0198                      | 0.0089 | 0.0063-0.0474 | 0.0324                      | 0.0163 | 0.0087-0.0876 | 0.0078                      | 0.0078 | 0.0002-0.0453 |
| 1991 | 0.0332                      | 0.0126 | 0.0132-0.0679 | 0.0647                      | 0.0301 | 0.0198-0.1482 | 0.0160                      | 0.0113 | 0.0019-0.0584 |
| 1992 | 0.0207                      | 0.0094 | 0.0066-0.0488 | 0.0258                      | 0.0152 | 0.0051-0.0785 | 0.0142                      | 0.01   | 0.0017-0.0538 |
| 1993 | 0.0448                      | 0.0142 | 0.0214-0.082  | 0.0752                      | 0.0295 | 0.029-0.1552  | 0.0218                      | 0.0126 | 0.0045-0.0653 |
| 1994 | 0.0221                      | 0.0099 | 0.0072-0.0512 | 0.0334                      | 0.0194 | 0.0068-0.0939 | 0.0140                      | 0.0099 | 0.0017-0.0526 |
| 1995 | 0.0472                      | 0.0143 | 0.0235-0.0843 | 0.0586                      | 0.0244 | 0.021-0.1272  | 0.0376                      | 0.017  | 0.0121-0.0886 |
| 1996 | 0.0330                      | 0.0117 | 0.0142-0.0649 | 0.0527                      | 0.0216 | 0.0193-0.115  | 0.0163                      | 0.0116 | 0.0019-0.0579 |
| 1997 | 0.0460                      | 0.0139 | 0.0229-0.0819 | 0.0798                      | 0.0289 | 0.0337-0.1566 | 0.0206                      | 0.0119 | 0.0042-0.0617 |
| 1998 | 0.0327                      | 0.0116 | 0.0141-0.0641 | 0.0565                      | 0.0232 | 0.0206-0.1216 | 0.0125                      | 0.0088 | 0.0015-0.0481 |
| 1999 | 0.0520                      | 0.0144 | 0.0277-0.0888 | 0.0782                      | 0.0262 | 0.0355-0.1482 | 0.0274                      | 0.0138 | 0.0074-0.0715 |
| 2000 | 0.0273                      | 0.0103 | 0.011-0.0561  | 0.0513                      | 0.0211 | 0.0186-0.1116 | 0.0063                      | 0.0063 | 0.0002-0.038  |
| 2001 | 0.0594                      | 0.0154 | 0.0332-0.0978 | 0.0967                      | 0.0294 | 0.048-0.1724  | 0.0273                      | 0.0137 | 0.0074-0.071  |
| 2002 | 0.0506                      | 0.014  | 0.0269-0.0863 | 0.0456                      | 0.0209 | 0.0143-0.1056 | 0.0537                      | 0.0191 | 0.023-0.1069  |
| 2003 | 0.0260                      | 0.0099 | 0.0104-0.0536 | 0.0314                      | 0.0182 | 0.0064-0.0868 | 0.0256                      | 0.0128 | 0.0069-0.0672 |
| 2004 | 0.0303                      | 0.0108 | 0.013-0.0597  | 0.0663                      | 0.0254 | 0.0263-0.1346 | 0.0053                      | 0.0053 | 0.0001-0.0347 |
| 2005 | 0.0609                      | 0.0153 | 0.0347-0.0989 | 0.1108                      | 0.0335 | 0.0552-0.195  | 0.0335                      | 0.0152 | 0.0107-0.0793 |
| 2006 | 0.0540                      | 0.0141 | 0.0301-0.0894 | 0.0648                      | 0.0248 | 0.0257-0.1316 | 0.0522                      | 0.0185 | 0.0225-0.1039 |

**Continued**

| Year        | Overall mortality rate      |        |               | Male mortality rate         |        |               | Female mortality rate       |        |               |
|-------------|-----------------------------|--------|---------------|-----------------------------|--------|---------------|-----------------------------|--------|---------------|
|             | Incidence rate <sup>a</sup> | SE     | 95% CI        | Incidence rate <sup>a</sup> | SE     | 95% CI        | Incidence rate <sup>a</sup> | SE     | 95% CI        |
| <b>2007</b> | 0.0401                      | 0.0117 | 0.0205-0.0707 | 0.0613                      | 0.0235 | 0.0243-0.1251 | 0.0265                      | 0.0119 | 0.0085-0.0653 |
| <b>2008</b> | 0.0296                      | 0.01   | 0.0134-0.0569 | 0.0289                      | 0.0149 | 0.0075-0.0756 | 0.0298                      | 0.0137 | 0.0093-0.0721 |
| <b>2009</b> | 0.0254                      | 0.0091 | 0.0109-0.0508 | 0.0411                      | 0.0186 | 0.0132-0.0948 | 0.0141                      | 0.0081 | 0.0029-0.0462 |
| <b>2010</b> | 0.0641                      | 0.0149 | 0.0383-0.1006 | 0.1350                      | 0.0341 | 0.0766-0.2184 | 0.0150                      | 0.0087 | 0.003-0.0482  |
| <b>2011</b> | 0.0537                      | 0.0136 | 0.0304-0.0877 | 0.1149                      | 0.0311 | 0.0622-0.1923 | 0.0101                      | 0.0072 | 0.0012-0.041  |
| <b>2012</b> | 0.0468                      | 0.0127 | 0.0253-0.079  | 0.0888                      | 0.0271 | 0.0438-0.1582 | 0.0211                      | 0.0122 | 0.0044-0.061  |
| <b>2013</b> | 0.0516                      | 0.0127 | 0.0298-0.0835 | 0.0805                      | 0.0247 | 0.0396-0.1447 | 0.0334                      | 0.014  | 0.0119-0.0755 |

SE, standard error; NR, not reached.

<sup>a</sup>Mortality rates were age-adjusted to the 2000 US standard population and expressed per 100,000 person-years.

<sup>b</sup>The values equal to zero when there were no cases reported were modified to a small positive constant (e. g. 0.0001), according to the statistical transformation.
